# Supplementary material
Source: MDPI journal article supplement (https://www.mdpi.com/2311-5629/8/4/78)
Supplement: s1 [file s1]

## Octave

Note: *OctCarb.m* means *Fit-routine.m*

In this section, an instruction for instll *Octave* under Windows, macOS and Linux. In addition, a an example script for *Octave* (*OctCarb*) for the refinement of measured WAXS/WANS data using the model of Ruland and Smarsly (2002).

All content in this repository is manly based on the following publications:

- Ruland, W. and Smarsly, B. M. (2002), X-ray scattering of non-graphitic carbon: an improved method of evaluation. J. Appl. Cryst., 35, 624-633, doi:10.1107/S0021889802011007
- Faber, K., Badaczewski, F., Oschatz, M., Mondin, G., Nickel, W., Kaskel, S., Smarsly, B. M. (2014), In-Depth Investigation of the Carbon Microstructure of Silicon Carbide-Derived Carbons by Wide-Angle X-ray Scattering, J. Phys. Chem. C., 118, 29, 15705-15715, doi:10.1021/jp502832x
- Pfaff, T., Simmermacher, M. & Smarsly, B. M. (2018), *CarbX*: a program for the evaluation of wide-angle X-ray scattering data of non-graphitic carbons, J. Appl. Cryst., 51, 219-229, doi:10.1107/S1600576718000195
- Osswald, O., Smarsly, B. M. (2022), J. Appl. Cryst., in preparation

### Fit-routine.m

The file *Fit-routine.m* contains an *Octave*-script (*OctCarb*) for the refinement of measured WAXS/WANS data using the model of Ruland and Smarsly (2002). The input parameters are described in the file itself and in <https://github.com/osswaldo/ngcs/README.md>.

### Output of *Fit-routine.m*

During the whole refinement, *Octave* shows a plot with the actual state of refinement (if acivated). After every refinement step, *Octave* will return the refined values, the reason of the refinement stop, a matrix containing the refined values and the standard deviations. After the whole refinment, *Octave* will also return all refined parameters and the resulting microstructure parameters including the mathematically calculated erros. In addition, the used reinfment script, the plots (if activated), the refined parameters and an table containing all parameters and the refined iObs-values and a file containing the output-matrices and other useful values will be exported.

**Console output** In addition to the informative outputs such as the start and end time, the current refinement step, etc., any errors and, after each refinement, the reason for the end of the refinement, the refined values and an associated matrix are output.

## Reasons for the end of the refinement

- *Canceled*: Canceled by user
- *Maximum number of iterations*.: The maximum number of iterations has been arrived. You have to increase the parameter *maxIter*.
- *Change in refinement parameters too small*.: Obvious
- *Change in calculated function too small*.: Obvious, see *tolFun*

**Refined values and matrices** The refined parameters and their values will be output after every refinement step by their name. The corresponding matrix also contains the values (1st column) and the error of it (2nd column, 1-sigma neighborhood of normal distribution). The 3rd and 4th columns contains the 2-sigma and 3-sigma neighborhoods of the normal distributions, respectively). An 1-sigma neighborhood of *10* means, that the error could not be calculated.

## General in- and Output parameters for the refinement-script (*OctCarb*)

In general, the input parameters for *iObs* and the associated *.oct* files are the same. Further information about all parameters can be found in the publications on top.

### Input parameters

#### iObs

| Number | Parameter | Description                                                                          |
|--------|-----------|--------------------------------------------------------------------------------------|
| 1      | cno       | Concentration of unorganized carbon                                                  |
| 2      | mu        | Shape factor for gamma function to calculate N, Lc and kapc                          |
| 3      | beta      | Shape factor for gamma function to calculate N, Lc and kapc                          |
| 4      | a3        | Average layer distance                                                               |
| 5      | da3       | Minimal layer distance                                                               |
| 6      | sig3      | Standard deviation of a3                                                             |
| 7      | u3        | Thermal motion                                                                       |
| 8      | eta       | Homogeneity of the stacks                                                            |
| 9      | nu        | Shape factor for gamma function to calculate La, lm and kapa                         |
| 10     | alpha     | Shape factor for gamma function to calculate La, lm and kapa                         |
| 11     | lcc       | Average C-C bond length                                                              |
| 12     | sig1      | Disorder of the layers (i.e. stress and strain)                                      |
| 13     | q         | Preferred orientation                                                                |
| 14     | cH        | Concentration of unorganized hydrogen                                                |
| 15     | cN        | Concentration of unorganized nitrogen                                                |
| 16     | cO        | Concentration of unorganized oxygen                                                  |
| 17     | cS        | Concentration of unorganized sulfur                                                  |
| 18     | dan       | Anisotropy of atomic form factor of carbon                                           |
| 19     | k         | Normalization constant for $\log_{10}(k * I_{e.u.} + \text{const1}) + \text{const2}$ |

| Number | Parameter            | Description                                                                                   |
|--------|----------------------|-----------------------------------------------------------------------------------------------|
| 20     | const1               | Constant shift for $\log_{10}(k * \text{Ie.u.} + \text{const1}) + \text{const2}$              |
| 21     | const2               | Non-constant (linear) shift for $\log_{10}(k * \text{Ie.u.} + \text{const1}) + \text{const2}$ |
| 22     | useQ                 | Switch for additional parameter for incoherent background                                     |
| 23     | b                    | Additional parameter for incoherent background                                                |
| 24     | useA                 | Switch for additional absorption parameters                                                   |
| 25     | density              | Density of the sample in $\text{g}/\text{cm}^3$                                               |
| 26     | sampleThickness      | Thickness of the sample in cm                                                                 |
| 27     | transmission         | Transmisison geometry (if false, reflection geometry is assumed)                              |
| 28     | absorptionCorrection | Additional correction factor for the calculation absorption coefficient                       |
| 29     | useP                 | Switch for addiational polarization correction                                                |
| 30     | polarizedBeam        | Is the beam polarized?                                                                        |
| 31     | polarizationDegree   | Polarization direction of beam in $^\circ$                                                    |
| 32     | useGradient          | Switch for additional exponential damping                                                     |
| 33     | g                    | Factor for exponential damping of the scattering intensity with $\text{Ie.u.}' = \exp(g)$     |
| 34     | useCorrAutoColl      | Switch for additional conversion from fixed irradiated length to fixed slit                   |
| 35     | par_r                | Radius of the goniometer (in cm; fixed due to experiment)                                     |
| 36     | par_delta            | Divergance angle (in $^\circ$ ; to choose by user)                                            |
| 37     | par_l                | Irradiated length (in cm; fixed during measurement)                                           |
| 38     | radiationType        | Type of radiation (0 = X-ray, 1 = neutron)                                                    |
| 39     | wavelength           | Wavelength                                                                                    |
| 40     | S                    | Vector, which contains the scattering vector values ( $s = \sin(\theta) / \lambda$ )          |
| 41     | coh                  | Switch for calculating coherent scattering                                                    |
| 42     | inc                  | Switch for calculating incoherent scattering                                                  |

### Relationship to microstructure parameters

| Parameter | Description                                                                               | Refined/calculated |
|-----------|-------------------------------------------------------------------------------------------|--------------------|
| a3        | Average layer distance                                                                    | refined            |
| a3min     | Minimal layer distance                                                                    | refined            |
| da3       | (= a3 - a3 min) Difference between average and minimal layer distance                     | calculated         |
| sig3      | Disorder of the stacks (standard deviation of a3)                                         | refined            |
| Lc        | (= N * a3) Average stack height                                                           | calculated         |
| N         | (= (mu+1)/beta) Average number of graphene layers per stack                               | calculated         |
| Nm        | (= mu/beta) Average number of graphene layers per stack                                   | calculated         |
| kapc      | (= 1/mu) Polydispersity of stack height                                                   | calculated         |
| kapr      | (= $3 * \pi^2 * (1/\nu + 1)/32 - 1$ ) Polydispersity of the radius of the graphene layers | calculated         |
| eps3      | (= da3/a3min) Disorder of stacks due to local strains                                     | calculated         |
| eta       | Homogeneity of the stacks                                                                 | refined            |
| q         | Preferred orientation                                                                     | refined            |
| lcc       | Average C-C bond length                                                                   | refined            |
| sig1      | Disorder of the layers (i.e. stress and strain)                                           | refined            |
| La        | (=(nu+1)/alpha) Average graphene layer size                                               | calculated         |
| lm        | (=nu/alpha) Average chord length                                                          | calculated         |

| Parameter | Description                                                                               | Refined/c  |
|-----------|-------------------------------------------------------------------------------------------|------------|
| kapa      | (=1/nu)Polydispersity of chord length                                                     | calculated |
| eps1      | Disorder of graphene layers due to local strains (currently not implemented)              | refined    |
| cH        | Concentration of unorganized hydrogen                                                     | known from |
| cN        | Concentration of unorganized nitrogen                                                     | known from |
| cO        | Concentration of unorganized oxygen                                                       | known from |
| cS        | Concentration of unorganized sulfur                                                       | known from |
| dan       | Anisotropy of atomic form factor of carbon                                                | refined    |
| k         | Normalization constant for $\log_{10}(k * I_{e.u.} + \text{const1}) + \text{const2}$      | refined    |
| const1    | Constant shift for $\log_{10}(k * I_{e.u.} + \text{const1}) + \text{const2}$              | refined    |
| const2    | Non-constant (linear) shift for $\log_{10}(k * I_{e.u.} + \text{const1}) + \text{const2}$ | refined    |

### Output parameters

*iObs* return a matrix that contains the x/y values of the calculations.

#### iObs

- First column: Scattering vector values ( $s$  in  $\text{\AA}^{-1}$ )
- Second column: Oberseved Intensity (*iObs*)

**File output** All files will be saved in the directory  $\langle fitPath \rangle / \langle filename \rangle$

**Plots** The plots of every refinement step and the error. For last step (refinement of all parameters together) a plot of the error (relative) and a logarithmic plot will be saved.

**output\_\*.txt** This file contains all refined and constant microstructure parameters.

**output\_\*.csv** In this file, all refined and constant microparameters are saved. An 1-sigma error of 10 means, that the error could not be calculated. In addition, the measured intensity ( $I$ ), the refined intensity ( $I_{fit}$ ) and the absolute ( $errorAbs$ ) and relative ( $errorRel$ ) error will be saved. This file can be opened directly with a table calculation program.

**data\_\*.mat** Contains additional matrices/vectors, which can be used for manual debugging:

- tolFun
- maxIter
- paramn
- paramFinished
- param1
- convergence1

- outp1
- result1
- stdabw1
- mat1
- param2
- convergence2
- outp2
- result2
- stdabw2
- mat2
- param3
- convergence3
- outp3
- result3
- stdabw3
- mat3
- param4
- convergence4
- outp4
- result4
- stdabw4
- mat4
- param5
- convergence5
- outp5
- result5
- stdabw5
- mat5
- rQuadratFit
- chiQuadratFit

### **Common warnings/errors during the refinement and how to fix them**

There are several errors, which can occur during the refinement process. The most common and their solutions are written down here:

#### **warning: lower and upper bounds identical for some parameters, fixing the respective parameters**

As the warning says, for one or more parameters, the upper and lower bound are identical. You can check the parameters and ignore the warning.

**warning: matrix singular to machine precision, rcond = nan**

Some values in the matrix are too close to 0 and your PC cannot calculate it. It is not a big problem, the PC will use 0 instead and forward the refinement. In general, this warning can be ignored.

**some lower bounds larger than upper bounds**

You set some lower bound to a higher value than the upper bound. You have to check and correct the parameters.

**no free parameters**

The lower and upper bounds of all parameters are fixed to a certain value, so there is nothing which can be refined. At least one parameter must be free.

**plt2vv: vector lengths must match**

This error typical occurs, if a parameter is changed, which influences the raw data, e.g., measFile, type, nStart, nEnd, nSkip. In the most of the cases, the error can resolved by restarting Octave.

**svd: cannot take SVD of matrix containing Inf or NaN values**

There are a lot of reasons, why this error is shown. It might be, that the starting parameters are too “bad”, the amount of measurement is too low, i.e. nSkip is too high or there is too less RAM available. First, you can ignore this error,\* Octave\* will try to calculate the Matrix again (10 times). If the script stops, the start parameters should be refined manually.

**error: Too many errors when refine**

This is not a specific error, it occurs, if something goes wrong. There should be another error or warning in the output and this is the reason, why the script stops. In principle, all manually changed parameters should be checked.

**The values of the error Matrix are 10, 20 and 30**

These values are not the real errors, but something like a placeholder or default value. A standard deviation of 10 means, that the error cannot be calculated correctly. This is a very common mistake when trying to refine too many parameters at the same time.

**Installation**

In principle,\* Octave\* is available for Microsoft Windows, Apple macOS, GNU/Linux and BSD systems. While a precompiled and executable\* Octave\* installer is available for Windows,\* Octave\* must be compiled on the system

itself for other systems. Independent of the system, some additional plugins for\* Octave\* have to be installed manually.

### **Install\* Octave\* under Windows (tested on Windows 10 64 bit)**

For Windows, an executable \*.exe file can be downloaded directly:  
<https://www.gnu.org/software/octave/download>

**Update\* Octave\* under Windows** Run 'Install\* Octave\* under Windows' again.

### **Install\* Octave\* under macOS (tested on macOS Catalina 10.15.7)**

Octave for macOS can be installed using a package manager like (Homebrew, MacPorts and Spack). In addition, a launcher app using AppleScript can also be created. The most easiest way is to use Homebrew (<https://brew.sh/>), so only this way will be described.

**Install\* Octave\* using Homebrew** The actual instruction is available under [https://wiki.octave.org/Octave\\_for\\_macOS](https://wiki.octave.org/Octave_for_macOS) 0. Information: The entire process can take up to a few hours, but the actual working time in which YOU have to do something is only a few minutes.

1. Install Xcode via the App Store
2. Open a terminal and execute the following commands:

```
/bin/bash -c "$(curl -fsSL https://raw.githubusercontent.com/Homebrew/install/master/install)"
brew update
brew install octave
```

**Further tips** In addition,\* Octave\* can also be compiled against gnuplot instead of qt. This result might perform better, so it is recommended to run also the following commands: 0. Information: The entire process can take up to a few hours, but the actual working time in which YOU have to do something is only a few minutes.

1. Open the file ~/.octaverc and paste the in:

```
setenv('GNUTERM','qt')
graphics_toolkit("gnuplot")
```

2. Open a terminal and execute the following commands:

```
sudo chown -R `whoami` /usr/local/share/ghostscript
brew link --overwrite ghostscript
brew install octave
# If install returns an error about not having a formular for octave, use the following command
brew tap --repair
```

**Update\* Octave\* under macOS using Homebrew** In addition,\* Octave\* can also be compiled against gnuplot instead of qt. This result might perform better, so it is recommended to run also the following commands: 0. Information: The entire process can take up to a few hours, but the actual working time in which YOU have to do something is only a few minutes.

1. Open a terminal and execute the following commands:

```
brew update && brew upgrade octave
```

### **Install\* Octave\* under Linux**

There are many different Linux distributions, so it is impossible to write one guide for all of them. Therefore, only the most relevant and widely used Linux distributions are considered. In principle,\* Octave\* can be installed with a pre-compiled package or by compiling on the operating system itself. Since the compilation is sometimes very complicated and requires a high level of prior knowledge, this procedure is NOT described here. The corresponding instructions can be found here: <https://wiki.octave.org/Category:Installation>

**Debian and Debian-based (such as Ubuntu) (tested on raspbian, which is based on Debian buster)** Link: [https://wiki.octave.org/Octave\\_for\\_Debian\\_systems](https://wiki.octave.org/Octave_for_Debian_systems)

1. Open a terminal and execute the following commands:

```
sudo apt-get install octave
sudo apt-get install octave-io octave-statistics octave-structs octave-optim
sudo apt-get install liboctave-dev
# Optional
sudo apt-get install octave-doc octave-info octave-htmldoc
```

**Red Hat Enterprise/CentOS** Link: [https://wiki.octave.org/Octave\\_for\\_Red\\_Hat\\_Linux\\_systems](https://wiki.octave.org/Octave_for_Red_Hat_Linux_systems)

1. Open a terminal and execute the following commands:

```
sudo yum install epel-release
sudo yum install octave
yum install octave-devel
```

**Arch Linux (not tested)** Link: [https://wiki.octave.org/Octave\\_for\\_Arch\\_Linux](https://wiki.octave.org/Octave_for_Arch_Linux)

1. Open a terminal and execute the following command:

```
sudo pacman -S octave
```

**Gentoo (not tested)** Link: [https://wiki.octave.org/Octave\\_for\\_GNU/Linux#Gentoo](https://wiki.octave.org/Octave_for_GNU/Linux#Gentoo)

1. Open a terminal and execute the following command:

```
sudo emerge --ask sci-mathematics/octave
```



**Fedora (not tested)** Link: [https://wiki.octave.org/Octave\\_for\\_Red\\_Hat\\_Linux\\_systems](https://wiki.octave.org/Octave_for_Red_Hat_Linux_systems)

1. Open a terminal and execute the following command:

```
sudo dnf install octave
sudo dnf install octave-devel
```

**openSUSE (not tested)** Link: [https://wiki.octave.org/Octave\\_for\\_openSUSE](https://wiki.octave.org/Octave_for_openSUSE)

1. Open a terminal and execute the following command:

```
sudo zypper install octave
sudo zypper install octave-devel
# The following steps are optional:
# Install OpenBLAS https://www.openblas.net/
# Afterwards, open a terminal and execute the following commands and choose OpenBLAS:
/usr/sbin/update-alternatives --config libblas.so.3
/usr/sbin/update-alternatives --config liblapack.so.3
```

### **Install\* Octave\* under BSD (not tested)**

For FreeBSD and OpenBSD, precompiled packages\* Octave\* packages are available ([https://wiki.octave.org/Octave\\_for\\_other\\_Unix\\_systems](https://wiki.octave.org/Octave_for_other_Unix_systems)):

**FreeBSD (not tested)** Open a terminal and execute the following command:

```
pkg_add -r octave
```

**OpenBSD (not tested)** Open a terminal and execute the following command:

```
pkg_add octave
```

### ***Important:* Install additional packages/plugins (optim)**

In order to use the script to refine wide-angle X-ray/neutron scattering (WAXS/WANS) data of NGCs using the Octave-script in this repository, some additional plugins must be installed. *optim* is used to perform the mathematical refinement/minimalization operations. *optim* itself need *struct* and *statistics* as dependencies and *statistis* in turn uses *io*. If an error occurs during the installation of *optim*, it is usually because the dependencies mentioned are missing. These must then also be installed. Basically, either the automatic package installation program from Octave, which downloads and installs the package, or the manual package installation program, in which you have to download the packages manually, can be used for the installation \* *optim* \*. In principle, manual installation should only be used if the automatic installation program has failed.

### **Automatic installation of *optim***

**Installation of *optim*** The *optim* package is available under <https://octave.sourceforge.io/optim/>. To install *optim* either open the Octave-GUI or the Octave-CLI and execute the following command:

```
pkg install -forge optim
```

If the installation failed due to missing dependencies, you have to install *struct*, *statistics* and *io* **before** the installation of *optim*. Afterwards, either open the Octave-GUI or the Octave-CLI and execute the following command again:

```
pkg install -forge optim
```

**Installation of *struct*** To install *struct* either open the Octave-GUI or the Octave-CLI and execute the following command:

```
pkg install -struct optim
```

**Installation of *statistics*** To install *statistics*, you first have to install *io*. To do this, either open the Octave-GUI or the Octave-CLI and execute the following commands:

```
pkg install -forge io
pkg install -forge statistics
```

### Manual installation of *optim*

If the automatic installation failed, you can also install *optim* and its dependencies manually.

1. Download *optim* and the needed dependencies (*structs*, *statistics* and *io*):

```
https://octave.sourceforge.io/optim/
https://octave.sourceforge.io/struct/index.html
https://octave.sourceforge.io/statistics/index.html
https://octave.sourceforge.io/io/index.html
```

2. Install first *io*, then *structs* and *statistics* and last *optim*. To do this, either open the Octave-GUI or the Octave-CLI and execute the following commands. `<path_to_file>` is the path, where the previously downloaded files are saved. The quotes (') are only necessary, if the path or file name contains spaces. `<version>` is the version of the downloaded package, i.e. the filename.

```
pkg install '<path_to_file>/io-<version>.tar.gz'
pkg install '<path_to_file>/struct-<version>.tar.gz'
pkg install '<path_to_file>/statistics-<version>.tar.gz'
pkg install '<path_to_file>/optim-<version>.tar.gz'
```
