# Supplementary material
Source: MDPI journal article supplement (https://www.mdpi.com/2311-5629/8/4/78)
Supplement: s1 [file s1]

|                                  | WP1200 |       | WP1800 |       | N18   |
|----------------------------------|--------|-------|--------|-------|-------|
|                                  | WAXS   | WANS  | WAXS   | WANS  | WAXS  |
| $c_n$                            | 0,00   | 0,00  | 0,00   | 0,00  | 0,00  |
| $\langle N \rangle$              | 4      | 3     | 37     | 26    | 2     |
| $a_3 / \text{\AA}$               | 3,45   | 3,48  | 3,42   | 3,43  | 3,54  |
| $L_c / nm$                       | 2      | 2     | 15     | 10    | 1     |
| $\kappa_c$                       | 0,43   | 0,63  | 0,19   | 0,11  | 0,32  |
| $a_{3min} / \text{\AA}$          | 3,00   | 3,00  | 3,00   | 3,22  | 3,12  |
| $\varepsilon_3$                  | 0,13   | 0,14  | 0,12   | 0,06  | 0,12  |
| $\sigma_3 / \text{\AA}$          | 0,22   | 0,31  | 0,11   | 0,12  | 0,28  |
| $u_3 / \text{\AA}$               | 0,00   | 0,00  | 0,00   | 0,00  | 0,00  |
| $\eta$                           | 1,00   | 1,00  | 1,00   | 1,00  | 0,83  |
| $L_a / nm$                       | 4      | 3     | 16     | 13    | 4     |
| $\kappa_a$                       | 0,25   | 0,25  | 0,25   | 0,25  | 0,25  |
| $\langle l \rangle / \text{\AA}$ | 31     | 22    | 130    | 100   | 33    |
| $l_{cc} / \text{\AA}$            | 1,412  | 1,418 | 1,417  | 1,421 | 1,412 |
| $\sigma_1$                       | 0,13   | 0,06  | 0,06   | 0,03  | 0,06  |
| $q$                              | 0,15   | 0,00  | 0,14   | 0,00  | 0,10  |
| $c_N$                            | 0      | 0     | 0      | 0     | 0     |
| $c_O$                            | 0      | 0     | 0      | 0     | 0     |
| $\Delta_{an}$                    | 0      | 0     | 0      | 0     | 0     |
| $\Delta a_3 / \sigma_3$          | 2,04   | 1,52  | 3,96   | 1,75  | 1,48  |
| $N^*$                            | 5      | 5     | 44     | 29    | 3     |

| 300   | MP2100 |       | H2100 |       | H28   |
|-------|--------|-------|-------|-------|-------|
| WANS  | WAXS   | WANS  | WAXS  | WANS  | WAXS  |
| 0,00  | 0,00   | 0,00  | 0,00  | 0,00  | 0,00  |
| 3     | 12     | 7     | 2     | 3     | 5     |
| 3,65  | 3,44   | 3,45  | 3,49  | 3,56  | 3,39  |
| 1     | 8      | 8     | 1     | 1     | 2     |
| 0,40  | 1,00   | 2,23  | 0,47  | 0,37  | 0,44  |
| 3,00  | 3,19   | 3,34  | 3,24  | 3,16  | 3,00  |
| 0,18  | 0,07   | 0,03  | 0,07  | 0,11  | 0,12  |
| 0,57  | 0,13   | 0,14  | 0,22  | 0,44  | 0,17  |
| 0,00  | 0,00   | 0,00  | 0,00  | 0,00  | 0,00  |
| 0,84  | 0,96   | 0,99  | 0,89  | 0,86  | 0,94  |
| 3     | 13     | 8     | 5     | 4     | 13    |
| 0,25  | 0,25   | 0,25  | 0,25  | 0,25  | 0,25  |
| 25    | 104    | 62    | 41    | 32    | 103   |
| 1,413 | 1,417  | 1,417 | 1,413 | 1,413 | 1,402 |
| 0,06  | 0,07   | 0,04  | 0,10  | 0,07  | 0,09  |
| 0,00  | 0,01   | 0,00  | 0,14  | 0,12  | 0,14  |
| 0     | 0      | 0     | 0     | 0     | 0     |
| 0     | 0      | 0     | 0     | 0     | 0     |
| 0     | 0      | 0     | 0     | 0     | 0     |
| 1,13  | 1,92   | 0,75  | 1,10  | 0,91  | 2,34  |
| 4     | 25     | 23    | 3     | 4     | 7     |

|       |
|-------|
| 350   |
| WANS  |
| 0,00  |
| 5     |
| 3,47  |
| 2     |
| 0,49  |
| 3,30  |
| 0,05  |
| 0,23  |
| 0,00  |
| 0,93  |
| 5     |
| 0,25  |
| 43    |
| 1,416 |
| 0,05  |
| 0,12  |
| 0     |
| 0     |
| 0     |
| 0,72  |
| 7     |
