# Supplementary material
Source: MDPI journal article supplement (https://www.mdpi.com/2311-5629/8/4/78)
Supplement: s1 [file s1]

## Compile und usage of an *iObs.oct*-file

To refine wide-angle X-ray/neutron scattering (WAXS/WANS) of non-graphitic carbons (NGCs) using Octave, the theoretical observed intensity (iObs) has to be calculated in Octave. This is done with the C ++ *iObs* code, which has to be compiled into an *iObs.oct* file. The files can be either downloaded from this page or compiled by yourself using the following instructions. Please note that the files already compiled here may not always be up-to-date and will not work on all systems.

### Example files

The provided example oct files are compiled with Octave 5.2.0 (Windows versions also 6.3.0). They may also work with other Octave/operating system versions, but this has not been tested.

### Numerical recipes

iObs uses parts of the Numerical Recipes (written in C), available under a commercial license. The machine-readable code of CarbX must therefore not be distributed. However, some public domain Numerical Recipes code is included in source code archive.

#### Included

- nrcomplex.h
- nrutil.h
- nrcomplex.c
- nrutil.c

#### Missing for iObs

- bessj0.c
- bsstep.c
- factln.c
- fpoly.c
- gammln.c
- gaulag.c
- hypdrv.c
- hypgeo.c
- hypser.c
- midinf.c
- mmid.c
- nr.h
- odeint.c
- pzextr.c
- qsimp.c

- spline.c
- splint.c
- trapzd.c

## Compile

To compile an *.oct* file, *Octave* must be installed first and the *mkoctfile* command must be executed second. The following commands are only examples and in most cases the paths need to be adjusted.

### Microsoft Windows

1. Install\* Octave\* as described in <https://github.com/osswald/ngcs/Octave/README.md>
2. To compile *iObs* to *iObs.oct*, just open the command line and execute the following commands (the paths may need to be adjusted):

```
cd C:\Octave\Octave-5.2.0\mingw64\bin
mkoctfile -L..\lib\octave\5.2.0 -I..\include\octave-5.2.0\octave "<*path_to_i0bs*>\i0bs.cpp"
```

This generates an *iObs.oct* file in the directory *C:\Octave\Octave-5.2.0\mingw64\bin\mkoctfile*.

### Apple macOS

1. Install Octave To compile *iObs* to *iObs.oct*, just open the command line and execute the following commands (the paths may need to be adjusted, *<path\_to\_iObs>* must be replaced):

```
mkoctfile -I/usr/local/bin/octave "<*path_to_i0bs*>/i0bs.cpp"
```

This generates an *iObs.oct* file in the current directory.

### Linux

1. Install Octave To compile *iObs* to *iObs.oct*, just open the command line and execute the following commands (the paths may need to be adjusted, *<path\_to\_iObs>* must be replaced):

```
mkoctfile -I/usr/local/bin/octave "<*path_to_i0bs*>/i0bs.cpp"
```

This generates an *iObs.oct* file in the current directory.
