# Supplementary material
Source: MDPI journal article supplement (https://www.mdpi.com/2311-5629/8/4/78)
Supplement: s1 [file s1]

## Instruction videos

Due to the size of the videos, they cannot be provided in this repository. Instead, you can find them at YouTube:

### English

Playlist: [https://www.youtube.com/playlist?list=PLTlnYDX5g1FylWfH8cSM\\_ZQUQpn3dSp6M](https://www.youtube.com/playlist?list=PLTlnYDX5g1FylWfH8cSM_ZQUQpn3dSp6M)

Octave installation: <https://www.youtube.com/watch?v=AHiKfX06htY>

iObs.oct compilation: <https://www.youtube.com/watch?v=xzRCd6HqVlg>

Refinement tutorial: <https://www.youtube.com/watch?v=vZx56rD7L0Y>

### Deutsch

Playlist: <https://www.youtube.com/playlist?list=PLTlnYDX5g1FwaOQkLXTxrpvHW9CRUwBrk>

Octave Installation: <https://www.youtube.com/watch?v=Ojic-iOd1y0>

Kompilierung: <https://www.youtube.com/watch?v=JCVGwU7movU>

Anleitung: <https://www.youtube.com/watch?v=8J50wnWgtIw>

### Alternative

If you prefer, you can also download the videos from my private server:

<https://ngcs.oss-wald.de/videos>

Copyright (C) 2022 Oliver Osswald
